# Supplementary material for: Dyslipidemia in diffuse large B-cell lymphoma based on the genetic subtypes: a single-center study of 259 Chinese patients
Source: Front Oncol. 2023 Jun 9;13:1172623. doi: 10.3389/fonc.2023.1172623 (PMC10299728; doi:10.3389/fonc.2023.1172623)
Supplement: Supplementary file 1 [file Table_1.xlsx]

## Sheet: Sheet1
Supplement: A total of 121 genes being analyzed in DLBCL patients
Number	Gene	significance of gene-mutation
1	ALK
2	AKT1
3	AKT2
4	APC
5	ARID1A
6	ARID1B
7	ARID2
8	ATM	Prognosis-relevant
9	ATR
10	B2M	Diagnosis-relevant
11	BCL10
12	BCL2	Both diagnosis-relevant and targeting medical gene
13	BCL6	Both diagnosis-relevant and targeting medical gene
14	BCOR
15	BCORL1
16	BIRC3	Prognosis-relevant
17	BTK	Targeting medical gene
18	BRAF
19	CALR
20	CARD11	Diagnosis-relevant
21	CCND1	Diagnosis-relevant
22	CCND2	Diagnosis-relevant
23	CCND3
24	CDKN1B
25	CDKN2A	Prognosis-relevant
26	CDKN2B
27	CDKN2C
28	CD274
29	CD70
30	CD79A	Diagnosis-relevant
31	CD79B	Diagnosis-relevant
32	CD83
33	CD58	Diagnosis-relevant
34	CIITA
35	CREBBP	Both diagnosis-relevant and targeting medical gene
36	CTLA4
37	CTNNB1
38	CXCR4	Prognosis-relevant
39	CYLD
40	DDX3X
41	DNMT3A
42	DTX1	Prognosis-relevant
43	EP300	Both diagnosis-relevant and targeting medical gene
44	ERBB4
45	EZH2	Both diagnosis-relevant and targeting medical gene
46	FAS
47	FAT1
48	FBXO11
49	FBXW7
50	FOXO1	Prognosis-relevant
51	GNA13	Diagnosis-relevant
52	HRAS
53	ID3	Diagnosis-relevant
54	IKZF1
55	INPP50
56	IRF4	Both diagnosis-relevant and targeting medical gene
57	JAK1	Targeting medical gene
58	JAK2	Targeting medical gene
59	JAK3	Targeting medical gene
60	KDM6A
61	KDR
62	KIT
63	KLHL6	Prognosis-relevant
64	KMT2A
65	KMT2C	Diagnosis-relevant
66	KMT2D	Diagnosis-relevant
67	KRAS
68	LYN	Targeting medical gene
69	MALT1	Targeting medical gene
70	MAP2K1	Targeting medical gene
71	MAP3K14
72	MDM2
73	MED12
74	MEF2B	Diagnosis-relevant
75	MTOR	Targeting medical gene
76	MYC	Both diagnosis-relevant and targeting medical gene
77	MYD88	Both diagnosis-relevant and targeting medical gene
78	NF1
79	NFKBIA
80	NFKB1
81	NFKB2
82	NFKBIE
83	NOTCH1	Prognosis-relevant
84	NOTCH2	Prognosis-relevant
85	NRAS
86	PAX5	Diagnosis-relevant
87	PDCD1LG2
88	PIK3R1
89	PIK3CA
90	PIK3CD	Targeting medical gene
91	PIM1
92	PLCG2
93	POT1
94	PRDM1
95	PTEN
96	PTPN6
97	PTPRD
98	RB1
99	ROS1
100	SETD2
101	SGK1
102	SF3B1
103	SOCS1
104	SPEN
105	SMARCA4
106	STAT3	Targeting medical gene
107	STAT6
108	SYK	Targeting medical gene
109	TBL1XR1
110	TCF3	Diagnosis-relevant
111	TET2
112	TNFAIP3	Diagnosis-relevant
113	TNFRSF14	Prognosis-relevant
114	TP53	Both diagnosis-relevant and prognosis-relevant
115	TP63
116	TP73
117	TRAF2
118	TRAF3
119	TRAF5
120	WHSC1	Diagnosis-relevant
121	XPO1	Prognosis-relevant
